# Supplementary material
Source: publisher site journal article supplement (https://www.dovepress.com/article/415141)

Figure S1. Flow chart of patients recruitment and follow-up in this study.

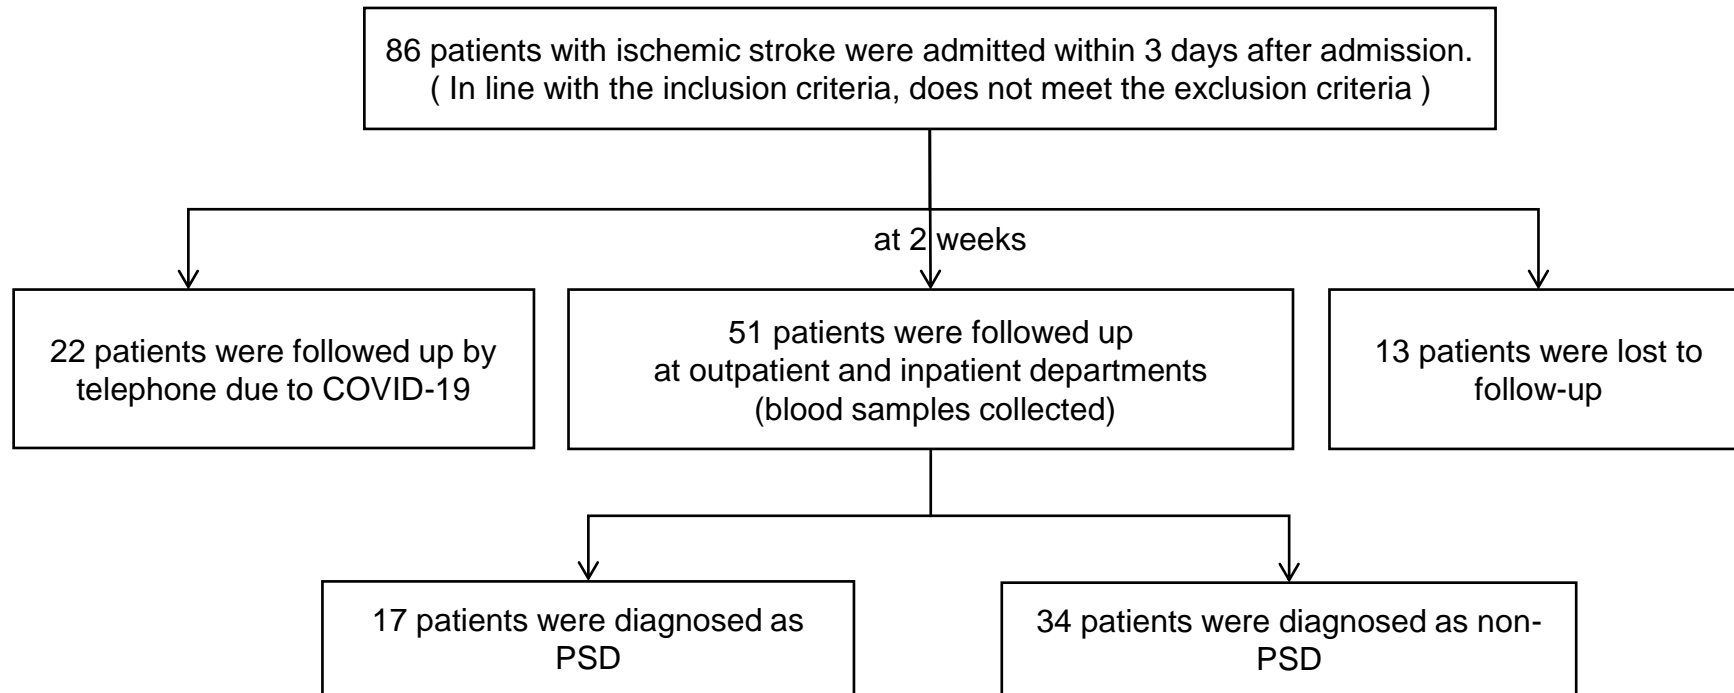

Supplement: Supplementary file 1 [file get_supplementary_file.php]
